# Supplementary material for: Association of General Anesthesia and Neuraxial Anesthesia in Caesarean Section with Maternal Postpartum Depression: A Retrospective Nationwide Population-Based Cohort Study
Source: MDPI journal article supplement (doi:10.3390/jpm12060970), 2022-06-14
Supplement: s1 [file s1]

**Supplementary Table S1** Subgroup analysis for the risk of postpartum depression in propensity score matched population

**Mother aged**

**Mother aged <25**

|                                        | NSD       | CS-GA            | CS-NA            |
|----------------------------------------|-----------|------------------|------------------|
| Depression or sleep disorders or drugs | Reference | 2.06 (1.71-2.48) | 1.24 (1.03-1.50) |
| Depression                             | Reference | 1.21 (0.86-1.71) | 0.83 (0.57-1.20) |
| Sleep disorder                         | Reference | 1.30 (0.93-1.81) | 1.00 (0.70-1.42) |
| Drug for hypnotic and antidepressant   | Reference | 2.20 (1.82-2.67) | 1.29 (1.06-1.57) |

**Mother aged 25-29**

|                                        | NSD       | CS-GA            | CS-NA            |
|----------------------------------------|-----------|------------------|------------------|
| Depression or sleep disorders or drugs | Reference | 2.23 (2.00-2.49) | 1.68 (1.51-1.88) |
| Depression                             | Reference | 1.32 (1.06-1.65) | 1.28 (1.02-1.59) |
| Sleep disorder                         | Reference | 1.04 (0.87-1.24) | 0.98 (0.82-1.17) |
| Drug for hypnotic and antidepressant   | Reference | 2.42 (2.16-2.72) | 1.83 (1.63-2.06) |

**Mother aged 30-34**

|                                        | NSD       | CS-GA            | CS-NA            |
|----------------------------------------|-----------|------------------|------------------|
| Depression or sleep disorders or drugs | Reference | 1.98 (1.84-2.13) | 1.53 (1.42-1.66) |
| Depression                             | Reference | 1.09 (0.94-1.27) | 0.98 (0.84-1.15) |
| Sleep disorder                         | Reference | 0.96 (0.85-1.08) | 0.99 (0.87-1.12) |
| Drug for hypnotic and antidepressant   | Reference | 2.18 (2.02-2.36) | 1.66 (1.53-1.80) |

**Mother aged 35-39**

|                                        | NSD       | CS-GA            | CS-NA            |
|----------------------------------------|-----------|------------------|------------------|
| Depression or sleep disorders or drugs | Reference | 2.36 (2.16-2.58) | 1.60 (1.46-1.76) |
| Depression                             | Reference | 1.05 (0.88-1.25) | 1.22 (1.03-1.45) |
| Sleep disorder                         | Reference | 1.06 (0.92-1.22) | 1.08 (0.94-1.23) |
| Drug for hypnotic and antidepressant   | Reference | 2.73 (2.48-3.00) | 1.73 (1.57-1.90) |

**Mother aged ≥40**

|                                        | NSD       | CS-GA            | CS-NA            |
|----------------------------------------|-----------|------------------|------------------|
| Depression or sleep disorders or drugs | Reference | 2.24 (1.88-2.67) | 1.66 (1.39-1.98) |
| Depression                             | Reference | 0.86 (0.64-1.16) | 0.73 (0.53-0.99) |
| Sleep disorder                         | Reference | 1.18 (0.91-1.53) | 0.96 (0.73-1.27) |
| Drug for hypnotic and antidepressant   | Reference | 2.37 (1.98-2.85) | 1.73 (1.44-2.09) |

## Father aged

### Father aged <25

|                                        | NSD       | CS-GA            | CS-NA            |
|----------------------------------------|-----------|------------------|------------------|
| Depression or sleep disorders or drugs | Reference | 2.00 (1.46-2.74) | 1.30 (0.94-1.78) |
| Depression                             | Reference | 0.67 (0.35-1.26) | 0.77 (0.42-1.43) |
| Sleep disorder                         | Reference | 1.34 (0.73-2.48) | 1.15 (0.62-2.16) |
| Drug for hypnotic and antidepressant   | Reference | 2.04 (1.48-2.82) | 1.32 (0.95-1.84) |

### Father aged 25-29

|                                        | NSD       | CS-GA            | CS-NA            |
|----------------------------------------|-----------|------------------|------------------|
| Depression or sleep disorders or drugs | Reference | 2.18 (1.88-2.53) | 1.48 (1.27-1.73) |
| Depression                             | Reference | 1.33 (1.00-1.77) | 1.01 (0.75-1.37) |
| Sleep disorder                         | Reference | 1.10 (0.86-1.41) | 0.80 (0.62-1.05) |
| Drug for hypnotic and antidepressant   | Reference | 2.34 (2.00-2.73) | 1.63 (1.39-1.91) |

### Father aged 30-34

|                                        | NSD       | CS-GA            | CS-NA            |
|----------------------------------------|-----------|------------------|------------------|
| Depression or sleep disorders or drugs | Reference | 2.15 (1.97-2.35) | 1.68 (1.53-1.84) |
| Depression                             | Reference | 1.05 (0.87-1.27) | 1.20 (1.00-1.44) |
| Sleep disorder                         | Reference | 1.05 (0.91-1.21) | 1.04 (0.90-1.20) |
| Drug for hypnotic and antidepressant   | Reference | 2.39 (2.18-2.62) | 1.81 (1.64-1.99) |

### Father aged 35-39

|                                        | NSD       | CS-GA            | CS-NA            |
|----------------------------------------|-----------|------------------|------------------|
| Depression or sleep disorders or drugs | Reference | 2.36 (2.16-2.59) | 1.66 (1.51-1.82) |
| Depression                             | Reference | 1.17 (0.98-1.41) | 1.13 (0.94-1.36) |
| Sleep disorder                         | Reference | 1.07 (0.92-1.24) | 1.15 (1.00-1.34) |
| Drug for hypnotic and antidepressant   | Reference | 2.67 (2.43-2.95) | 1.75 (1.59-1.93) |

### Father aged ≥40

|                                        | NSD       | CS-GA            | CS-NA            |
|----------------------------------------|-----------|------------------|------------------|
| Depression or sleep disorders or drugs | Reference | 2.35 (2.08-2.64) | 1.65 (1.46-1.86) |
| Depression                             | Reference | 0.99 (0.79-1.24) | 0.99 (0.79-1.24) |
| Sleep disorder                         | Reference | 1.02 (0.85-1.23) | 1.00 (0.83-1.20) |
| Drug for hypnotic and antidepressant   | Reference | 2.57 (2.27-2.91) | 1.72 (1.52-1.95) |

## Gestational age

### Gestational age <28 weeks

|                                        | NSD       | CS-GA            | CS-NA            |
|----------------------------------------|-----------|------------------|------------------|
| Depression or sleep disorders or drugs | Reference | 1.95 (1.59-2.39) | 1.06 (0.85-1.32) |
| Depression                             | Reference | 0.88 (0.62-1.25) | 0.71 (0.47-1.07) |
| Sleep disorder                         | Reference | 0.88 (0.65-1.18) | 0.69 (0.49-0.97) |
| Drug for hypnotic and antidepressant   | Reference | 2.37 (1.92-2.91) | 1.18 (0.94-1.49) |

### Gestational age 28-32 weeks

|                                        | NSD       | CS-GA            | CS-NA            |
|----------------------------------------|-----------|------------------|------------------|
| Depression or sleep disorders or drugs | Reference | 2.38 (1.98-2.87) | 1.56 (1.29-1.88) |
| Depression                             | Reference | 1.06 (0.74-1.52) | 1.04 (0.72-1.50) |
| Sleep disorder                         | Reference | 1.15 (0.84-1.57) | 0.98 (0.71-1.36) |
| Drug for hypnotic and antidepressant   | Reference | 2.47 (2.04-2.98) | 1.62 (1.33-1.96) |

### Gestational age 32-37 weeks

|                                        | NSD       | CS-GA            | CS-NA            |
|----------------------------------------|-----------|------------------|------------------|
| Depression or sleep disorders or drugs | Reference | 2.15 (1.93-2.39) | 1.58 (1.41-1.76) |
| Depression                             | Reference | 1.01 (0.83-1.23) | 1.11 (0.92-1.36) |
| Sleep disorder                         | Reference | 0.99 (0.84-1.17) | 1.01 (0.86-1.19) |
| Drug for hypnotic and antidepressant   | Reference | 2.36 (2.11-2.65) | 1.65 (1.47-1.85) |

### Gestational age 37-42 weeks

|                                        | NSD       | CS-GA            | CS-NA            |
|----------------------------------------|-----------|------------------|------------------|
| Depression or sleep disorders or drugs | Reference | 2.10 (1.99-2.23) | 1.60 (1.51-1.70) |
| Depression                             | Reference | 1.13 (1.01-1.27) | 1.05 (0.94-1.18) |
| Sleep disorder                         | Reference | 1.02 (0.93-1.12) | 1.03 (0.93-1.13) |
| Drug for hypnotic and antidepressant   | Reference | 2.33 (2.19-2.47) | 1.73 (1.63-1.84) |

### Gestational age ≥42 weeks

|                                        | NSD       | CS-GA             | CS-NA            |
|----------------------------------------|-----------|-------------------|------------------|
| Depression or sleep disorders or drugs | Reference | 1.69 (0.35-8.22)  | 0.68 (0.12-3.87) |
| Depression                             | Reference | -                 | -                |
| Sleep disorder                         | Reference | -                 | -                |
| Drug for hypnotic and antidepressant   | Reference | 1.85 (0.34-10.05) | 0.61 (0.08-4.41) |

## Infant's birth weight

Infant's birth weight <1000 g

|                                        | NSD       | CS-GA            | CS-NA            |
|----------------------------------------|-----------|------------------|------------------|
| Depression or sleep disorders or drugs | Reference | 1.88 (1.53-2.31) | 1.09 (0.89-1.35) |
| Depression                             | Reference | 0.76 (0.53-1.09) | 0.73 (0.50-1.06) |
| Sleep disorder                         | Reference | 0.92 (0.69-1.22) | 0.65 (0.47-0.90) |
| Drug for hypnotic and antidepressant   | Reference | 2.23 (1.81-2.75) | 1.26 (1.01-1.56) |

Birth weight 1000-1500 g

|                                        | NSD       | CS-GA            | CS-NA            |
|----------------------------------------|-----------|------------------|------------------|
| Depression or sleep disorders or drugs | Reference | 2.02 (1.66-2.46) | 1.38 (1.13-1.68) |
| Depression                             | Reference | 0.91 (0.62-1.34) | 1.02 (0.71-1.49) |
| Sleep disorder                         | Reference | 0.87 (0.62-1.22) | 0.89 (0.63-1.24) |
| Drug for hypnotic and antidepressant   | Reference | 2.21 (1.81-2.71) | 1.48 (1.21-1.81) |

Birth weight 1500-2500 g

|                                        | NSD       | CS-GA            | CS-NA            |
|----------------------------------------|-----------|------------------|------------------|
| Depression or sleep disorders or drugs | Reference | 2.22 (2.00-2.46) | 1.61 (1.45-1.79) |
| Depression                             | Reference | 1.14 (0.95-1.38) | 1.00 (0.82-1.20) |
| Sleep disorder                         | Reference | 0.98 (0.83-1.15) | 1.00 (0.86-1.17) |
| Drug for hypnotic and antidepressant   | Reference | 2.44 (2.19-2.71) | 1.67 (1.50-1.86) |

Birth weight 2500-3500 g

|                                        | NSD       | CS-GA            | CS-NA            |
|----------------------------------------|-----------|------------------|------------------|
| Depression or sleep disorders or drugs | Reference | 2.17 (2.04-2.31) | 1.65 (1.55-1.76) |
| Depression                             | Reference | 1.17 (1.03-1.32) | 1.15 (1.02-1.31) |
| Sleep disorder                         | Reference | 1.10 (0.99-1.22) | 1.08 (0.98-1.20) |
| Drug for hypnotic and antidepressant   | Reference | 2.42 (2.26-2.59) | 1.80 (1.68-1.93) |

Birth weight ≥3500 g

|                                        | NSD       | CS-GA            | CS-NA            |
|----------------------------------------|-----------|------------------|------------------|
| Depression or sleep disorders or drugs | Reference | 2.14 (1.87-2.45) | 1.44 (1.25-1.66) |
| Depression                             | Reference | 0.99 (0.74-1.32) | 0.92 (0.69-1.24) |
| Sleep disorder                         | Reference | 0.95 (0.76-1.19) | 0.94 (0.75-1.19) |
| Drug for hypnotic and antidepressant   | Reference | 2.32 (2.01-2.69) | 1.51 (1.30-1.75) |

## Urban

### Urban

|                                        | NSD       | CS-GA            | CS-NA            |
|----------------------------------------|-----------|------------------|------------------|
| Depression or sleep disorders or drugs | Reference | 2.20 (2.07-2.33) | 1.59 (1.50-1.69) |
| Depression                             | Reference | 1.15 (1.02-1.30) | 1.12 (0.99-1.26) |
| Sleep disorder                         | Reference | 1.08 (0.98-1.19) | 1.04 (0.94-1.14) |
| Drug for hypnotic and antidepressant   | Reference | 2.43 (2.28-2.59) | 1.71 (1.60-1.82) |

### Sub-urban

|                                        | NSD       | CS-GA            | CS-NA            |
|----------------------------------------|-----------|------------------|------------------|
| Depression or sleep disorders or drugs | Reference | 2.20 (2.02-2.39) | 1.62 (1.49-1.76) |
| Depression                             | Reference | 0.98 (0.84-1.16) | 0.93 (0.79-1.10) |
| Sleep disorder                         | Reference | 0.98 (0.86-1.12) | 0.99 (0.86-1.13) |
| Drug for hypnotic and antidepressant   | Reference | 2.46 (2.25-2.69) | 1.78 (1.63-1.95) |

### Rural

|                                        | NSD       | CS-GA            | CS-NA            |
|----------------------------------------|-----------|------------------|------------------|
| Depression or sleep disorders or drugs | Reference | 1.68 (1.42-1.98) | 1.21 (1.02-1.44) |
| Depression                             | Reference | 1.17 (0.86-1.59) | 1.10 (0.81-1.50) |
| Sleep disorder                         | Reference | 0.89 (0.68-1.18) | 0.90 (0.68-1.19) |
| Drug for hypnotic and antidepressant   | Reference | 1.84 (1.55-2.18) | 1.25 (1.05-1.49) |

## Insurance amount

### Insurance amount <20000

|                                        | NSD       | CS-GA            | CS-NA            |
|----------------------------------------|-----------|------------------|------------------|
| Depression or sleep disorders or drugs | Reference | 2.12 (1.97-2.29) | 1.55 (1.44-1.68) |
| Depression                             | Reference | 1.14 (1.00-1.31) | 0.96 (0.83-1.10) |
| Sleep disorder                         | Reference | 1.08 (0.96-1.22) | 1.01 (0.89-1.14) |
| Drug for hypnotic and antidepressant   | Reference | 2.27 (2.10-2.46) | 1.64 (1.51-1.78) |

### Insurance amount 20000-50000

|                                        | NSD       | CS-GA            | CS-NA            |
|----------------------------------------|-----------|------------------|------------------|
| Depression or sleep disorders or drugs | Reference | 2.18 (2.05-2.32) | 1.57 (1.48-1.68) |
| Depression                             | Reference | 1.09 (0.95-1.24) | 1.15 (1.01-1.31) |
| Sleep disorder                         | Reference | 1.02 (0.92-1.13) | 1.01 (0.91-1.12) |
| Drug for hypnotic and antidepressant   | Reference | 2.46 (2.30-2.63) | 1.71 (1.60-1.83) |

### Insurance amount >=50000

|                                        | NSD       | CS-GA            | CS-NA            |
|----------------------------------------|-----------|------------------|------------------|
| Depression or sleep disorders or drugs | Reference | 2.05 (1.68-2.50) | 1.63 (1.34-2.00) |
| Depression                             | Reference | 0.84 (0.54-1.29) | 1.07 (0.71-1.61) |
| Sleep disorder                         | Reference | 0.87 (0.63-1.19) | 1.01 (0.75-1.37) |
| Drug for hypnotic and antidepressant   | Reference | 2.51 (2.03-3.10) | 1.81 (1.45-2.25) |

*NSD: Normal Spontaneous Delivery*

*CS-GA: Cesarean Section- General Anesthesia*

*CS-NA: Neuraxial - General Anesthesia*
